# Supplementary material for: Prevalence of Methicillin-Resistant Staphylococcus aureus and Other Staphylococcus Species in Raw Meat Samples Intended for Human Consumption in Benin City, Nigeria: Implications for Public Health
Source: PubMed Central journal article supplement (PMC5086688; doi:10.3390/ijerph13100949), 2016-09-24

# Supplementary Materials: Prevalence of Methicillin-Resistant *Staphylococcus aureus* and Other *Staphylococcus* Species in Raw Meat Samples Intended for Human Consumption in Benin City, Nigeria: Implications for Public Health

Etinosa O. Igbinosa, Abeni Beshiru, Lucy U. Akporehe, Faith E. Oviasogie and Owen O. Igbinosa

**Table S1.** Antimicrobial agents, disc content and zone diameter interpretative standards for *Staphylococcus* species.

| Antibiotics Group | Antimicrobial Agent           | Disc Content | Zone Diameter (mm) |              |           |
|-------------------|-------------------------------|--------------|--------------------|--------------|-----------|
|                   |                               |              | Resistant          | Intermediate | Sensitive |
| Penicillins       | Methicillin                   | 5 µg         | ≤9                 | 10–13        | ≥14       |
|                   | Cloxacillin                   | 5 µg         | ≤10                | 11–12        | ≥13       |
|                   | Penicillin                    | 10 µg        | ≤28                | -            | ≥29       |
|                   | Amoxicillin                   | 10 µg        | ≤19                | -            | ≥20       |
| Macrolides        | Erythromycin                  | 15 µg        | ≤13                | 14–22        | ≥23       |
| Aminoglycosides   | Gentamycin                    | 10 µg        | ≤12                | 13–14        | ≥15       |
|                   | Kanamycin                     | 30 µg        | ≤13                | 14–17        | ≥18       |
| Lincosamides      | Clindamycin                   | 2 µg         | ≤14                | 15–20        | ≥21       |
| Phenicol          | Chloramphenicol               | 30 µg        | ≤12                | 13–17        | ≥18       |
| Folates           | Trimethoprim-Sulfamethoxazole | 1.25 µg      | ≤10                | 11–15        | ≥16       |
| Glycopeptides     | Vancomycin                    | 30 µg        | -                  | -            | ≥15       |

Source: CLSI [1].

**Table S2.** Staphylococci species isolated from pork samples.

| Isolates Code | Identification                      | Max Score | Total score | Query Cover % | E-Value | Identity % | Accession  |
|---------------|-------------------------------------|-----------|-------------|---------------|---------|------------|------------|
| P1            | <i>Staphylococcus aureus</i>        | 97.6      | 97.6        | 100%          | 1e-17   | 100%       | FN646074.1 |
| P2            | <i>Staphylococcus aureus</i>        | 85.7      | 85.7        | 87%           | 5e-14   | 100%       | JF170962.1 |
| P3            | <i>Staphylococcus aureus</i>        | 85.7      | 85.7        | 87%           | 5e-14   | 100%       | JF170962.1 |
| P4            | <i>Staphylococcus aureus</i>        | 85.7      | 85.7        | 87%           | 5e-14   | 100%       | JF170962.1 |
| P5            | <i>Staphylococcus aureus</i>        | 97.6      | 97.6        | 100%          | 1e-17   | 100%       | FN646074.1 |
| P6            | <i>Staphylococcus aureus</i>        | 97.6      | 97.6        | 100%          | 1e-17   | 100%       | FN646074.1 |
| P7            | <i>Staphylococcus aureus</i>        | 85.7      | 85.7        | 87%           | 5e-14   | 100%       | JF170962.1 |
| P8            | <i>Staphylococcus aureus</i>        | 85.7      | 85.7        | 87%           | 5e-14   | 100%       | JF170962.1 |
| P9            | <i>Staphylococcus aureus</i>        | 85.7      | 85.7        | 87%           | 5e-14   | 100%       | JF170962.1 |
| P10           | <i>Staphylococcus aureus</i>        | 97.6      | 97.6        | 100%          | 1e-17   | 100%       | FN646074.1 |
| P11           | <i>Staphylococcus aureus</i>        | 85.7      | 85.7        | 87%           | 5e-14   | 100%       | JF170962.1 |
| P12           | <i>Staphylococcus aureus</i>        | 85.7      | 85.7        | 87%           | 5e-14   | 100%       | JF170962.1 |
| P13           | <i>Staphylococcus aureus</i>        | 97.6      | 97.6        | 100%          | 1e-17   | 100%       | FN646074.1 |
| P14           | <i>Staphylococcus aureus</i>        | 85.7      | 85.7        | 87%           | 5e-14   | 100%       | JF170962.1 |
| P15           | <i>Staphylococcus epidermidis</i>   | 89.7      | 89.7        | 100%          | 3e-15   | 98%        | CP010942.1 |
| P16           | <i>Staphylococcus epidermidis</i>   | 89.7      | 89.7        | 100%          | 3e-15   | 98%        | CP000029.1 |
| P17           | <i>Staphylococcus epidermidis</i>   | 89.7      | 89.7        | 100%          | 3e-15   | 98%        | CP009046.1 |
| P18           | <i>Staphylococcus epidermidis</i>   | 89.7      | 89.7        | 100%          | 3e-15   | 98%        | CP010942.1 |
| P19           | <i>Staphylococcus saprophyticus</i> | 97.6      | 97.6        | 100%          | 1e-17   | 100%       | KT372842.1 |
| P20           | <i>Staphylococcus epidermidis</i>   | 89.7      | 89.7        | 100%          | 3e-15   | 98%        | CP000029.1 |
| P21           | <i>Staphylococcus epidermidis</i>   | 89.7      | 89.7        | 100%          | 3e-15   | 98%        | HG813242.1 |
| P22           | <i>Staphylococcus sciuri</i>        | 95.6      | 95.6        | 100%          | 5e-17   | 100%       | FN646076.1 |
| P23           | <i>Staphylococcus epidermidis</i>   | 89.7      | 89.7        | 100%          | 3e-15   | 98%        | HG326660.1 |
| P24           | <i>Staphylococcus epidermidis</i>   | 89.7      | 89.7        | 100%          | 3e-15   | 98%        | CP009046.1 |
| P25           | <i>Staphylococcus saprophyticus</i> | 97.6      | 97.6        | 100%          | 1e-17   | 100%       | KT372841.1 |
| P26           | <i>Staphylococcus epidermidis</i>   | 89.7      | 89.7        | 100%          | 3e-15   | 98%        | AF269843.1 |

**Table S3.** Staphylococci species isolated from beef samples.

| Isolates Code | Identification                    | Max Score | Total Score | Query Cover % | E-Value | Identity % | Accession  |
|---------------|-----------------------------------|-----------|-------------|---------------|---------|------------|------------|
| B1            | <i>Staphylococcus epidermidis</i> | 89.7      | 89.7        | 100%          | 3e-15   | 98%        | FJ577582.1 |
| B2            | <i>Staphylococcus aureus</i>      | 97.6      | 97.6        | 100%          | 1e-17   | 100%       | FN646074.1 |
| B3            | <i>Staphylococcus aureus</i>      | 85.7      | 85.7        | 87%           | 5e-14   | 100%       | JF170962.1 |
| B4            | <i>Staphylococcus aureus</i>      | 97.6      | 97.6        | 100%          | 1e-17   | 100%       | FN646074.1 |
| B5            | <i>Staphylococcus epidermidis</i> | 89.7      | 89.7        | 100%          | 3e-15   | 98%        | FJ577582.1 |
| B6            | <i>Staphylococcus aureus</i>      | 85.7      | 85.7        | 87%           | 5e-14   | 100%       | JF170962.1 |
| B7            | <i>Staphylococcus epidermidis</i> | 89.7      | 89.7        | 100%          | 3e-15   | 98%        | CP000029.1 |
| B8            | <i>Staphylococcus aureus</i>      | 97.6      | 97.6        | 100%          | 1e-17   | 100%       | FN646074.1 |
| B9            | <i>Staphylococcus aureus</i>      | 85.7      | 85.7        | 87%           | 5e-14   | 100%       | JF170962.1 |
| B10           | <i>Staphylococcus aureus</i>      | 85.7      | 85.7        | 87%           | 5e-14   | 100%       | JF170962.1 |
| B11           | <i>Staphylococcus aureus</i>      | 97.6      | 97.6        | 100%          | 1e-17   | 100%       | FN646074.1 |
| B12           | <i>Staphylococcus aureus</i>      | 85.7      | 85.7        | 87%           | 5e-14   | 100%       | JF170962.1 |
| B13           | <i>Staphylococcus aureus</i>      | 97.6      | 97.6        | 100%          | 1e-17   | 100%       | FN646074.1 |
| B14           | <i>Staphylococcus epidermidis</i> | 89.7      | 89.7        | 100%          | 3e-15   | 98%        | AE015929.1 |

**Table S4.** Staphylococci species isolated from chicken samples.

| Isolates Code | Identification                    | Max Score | Total Score | Query Cover % | E-Value | Identity % | Accession  |
|---------------|-----------------------------------|-----------|-------------|---------------|---------|------------|------------|
| C1            | <i>Staphylococcus epidermidis</i> | 89.7      | 89.7        | 100%          | 3e-15   | 98%        | CP000029.1 |
| C2            | <i>Staphylococcus aureus</i>      | 85.7      | 85.7        | 87%           | 5e-14   | 100%       | JF170962.1 |
| C3            | <i>Staphylococcus aureus</i>      | 97.6      | 97.6        | 100%          | 1e-17   | 100%       | FN646074.1 |
| C4            | <i>Staphylococcus aureus</i>      | 85.7      | 85.7        | 87%           | 5e-14   | 100%       | JF170962.1 |
| C5            | <i>Staphylococcus epidermidis</i> | 89.7      | 89.7        | 100%          | 3e-15   | 98%        | FJ577582.1 |
| C6            | <i>Staphylococcus xylosus</i>     | 97.6      | 97.6        | 100%          | 1e-17   | 100%       | KT351728.1 |
| C7            | <i>Staphylococcus epidermidis</i> | 89.7      | 89.7        | 100%          | 3e-15   | 98%        | AF269843.1 |
| C8            | <i>Staphylococcus aureus</i>      | 97.6      | 97.6        | 100%          | 1e-17   | 100%       | FN646074.1 |
| C9            | <i>Staphylococcus aureus</i>      | 97.6      | 97.6        | 100%          | 1e-17   | 100%       | FN646074.1 |
| C10           | <i>Staphylococcus aureus</i>      | 85.7      | 85.7        | 87%           | 5e-14   | 100%       | JF170962.1 |

## References

1. Clinical and Laboratory Standards Institute (CLSI). *Performance Standards for Antimicrobial Susceptibility Testing*; Twenty-Fourth International Supplements; Clinical and Laboratory Standards Institute: Wayne, PA, USA, 2014; p. 230.

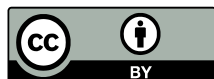

Supplement: ijerph-13-00949-s001.pdf [file ijerph-13-00949-s001.pdf]
